# Supplementary material
Source: PubMed Central journal article supplement (PMC8366297)
Supplement: deab012_Supplementary_data.pdf [file deab012_Supplementary_data.pdf]

## Supplementary data

Below are the questions asked in each cohort for self-report of endometriosis.

### Black Women’s Health Study

#### 1995

Has a doctor ever told you that you have any of the following conditions? If yes, mark the condition and the age it was first diagnosed

|               |                       |                       |                       |                       |                       |                       |
|---------------|-----------------------|-----------------------|-----------------------|-----------------------|-----------------------|-----------------------|
|               | <b>No</b>             | <b>Yes</b>            | <b>Less than 30</b>   | <b>30-39</b>          | <b>40-49</b>          | <b>50 or more</b>     |
| Endometriosis | <input type="radio"/> |

#### 1997

If a doctor has told you that you had any of the following conditions, please fill in the ovals indicating when it was first diagnosed

|               |                                  |                                 |
|---------------|----------------------------------|---------------------------------|
|               | <b>Yes, before March 1, 1995</b> | <b>Yes, after March 1, 1995</b> |
| Endometriosis | <input type="radio"/>            | <input type="radio"/>           |

#### 1999

Between March 1997 and March 1999, if you were diagnosed with any of the following conditions, please fill in the circles and indicate the year it was first diagnosed

|                          |                       |                                           |
|--------------------------|-----------------------|-------------------------------------------|
|                          | <b>Yes</b>            | <b>Year</b>                               |
| Endometriosis            | <input type="radio"/> | <input type="text"/> <input type="text"/> |
| Confirmed by laparoscopy | <input type="radio"/> |                                           |

#### 2001

Between March 1999 and March 2001, if you were diagnosed with any of the following conditions, please fill in the circles and indicate the year it was first diagnosed

|                          |                       |                                           |
|--------------------------|-----------------------|-------------------------------------------|
|                          | <b>Yes</b>            | <b>Year</b>                               |
| Endometriosis            | <input type="radio"/> | <input type="text"/> <input type="text"/> |
| Confirmed by laparoscopy | <input type="radio"/> |                                           |

#### 2007

Have you EVER been diagnosed with any of the following conditions?

|                                          |                       |                                           |
|------------------------------------------|-----------------------|-------------------------------------------|
|                                          | <b>Yes</b>            | <b>Year</b>                               |
| Endometriosis (confirmed by laparoscopy) | <input type="radio"/> | <input type="text"/> <input type="text"/> |

#### 2009

Since March 2007, if you were diagnosed with any of the following conditions, please fill in the circle for yes and write in the year it was first diagnosed

|                                          |                       |                                           |
|------------------------------------------|-----------------------|-------------------------------------------|
|                                          | <b>Yes</b>            | <b>Year</b>                               |
| Endometriosis (confirmed by laparoscopy) | <input type="radio"/> | <input type="text"/> <input type="text"/> |

#### 2011

Since March 2009, if you were diagnosed with any of the following conditions, please fill in the circle for yes and write in the year it was first diagnosed

|                                          |                       |                                                                                     |
|------------------------------------------|-----------------------|-------------------------------------------------------------------------------------|
|                                          | <b>Yes</b>            | <b>Year</b>                                                                         |
| Endometriosis (confirmed by laparoscopy) | <input type="radio"/> | <input type="text"/> <input type="text"/> <input type="text"/> <input type="text"/> |

#### 2013

Since March 2011, if you were diagnosed with any of the following conditions, please fill in the circle for yes and write in the year it was first diagnosed

|                                                                                                  |                       |                                                                                     |
|--------------------------------------------------------------------------------------------------|-----------------------|-------------------------------------------------------------------------------------|
|                                                                                                  | <b>Yes</b>            | <b>Year</b>                                                                         |
| Endometriosis (cells normally in the uterus are found outside of the uterus causing pelvic pain) | <input type="radio"/> | <input type="text"/> <input type="text"/> <input type="text"/> <input type="text"/> |

Etude Epidémiologique auprès de femmes de la Mutuelle Générale de l'Education Nationale (E3N) Cohort

**1990**

Which of the following illnesses or procedures have you ever had?

|               | Yes                   | Age at illness onset  |                       |                       |                       |                       |                       |                       |
|---------------|-----------------------|-----------------------|-----------------------|-----------------------|-----------------------|-----------------------|-----------------------|-----------------------|
|               |                       | 10 or younger         | 11-14                 | 15-19                 | 20-29                 | 30-39                 | 40-49                 | 50 or older           |
| Endometriosis | <input type="radio"/> |

**1992**

Uterine and ovarian illnesses

Reported exact age of onset and diagnosis and treatment of endometriosis

**1993**

Since January 1992, have you had any illnesses of the uterus or ovaries?

|               | Yes                   | Date of illness      |                      |                      |                      |
|---------------|-----------------------|----------------------|----------------------|----------------------|----------------------|
|               |                       | Month                |                      | Year                 |                      |
| Endometriosis | <input type="radio"/> | <input type="text"/> | <input type="text"/> | <input type="text"/> | <input type="text"/> |

What was the treatment?

|                         |                      |
|-------------------------|----------------------|
| Surgery                 | <input type="text"/> |
| Hormone treatment       | <input type="text"/> |
| Other medical treatment | <input type="text"/> |
| No treatment            | <input type="text"/> |
| Don't know              | <input type="text"/> |

Please indicate the exams that were performed for this disease:

|                |                      |
|----------------|----------------------|
| Biopsy         | <input type="text"/> |
| Laparoscopy    | <input type="text"/> |
| Hystero-graphy | <input type="text"/> |
| Hysteroscopy   | <input type="text"/> |
| Ultrasound     | <input type="text"/> |
| Don't know     | <input type="text"/> |

**1995**

Since June 1993, have you had any illnesses of the uterus or ovaries?

|               | Yes                   | Date of illness      |                      |                      |                      |
|---------------|-----------------------|----------------------|----------------------|----------------------|----------------------|
|               |                       | Month                |                      | Year                 |                      |
| Endometriosis | <input type="radio"/> | <input type="text"/> | <input type="text"/> | <input type="text"/> | <input type="text"/> |

What was the treatment?

|                         |                      |
|-------------------------|----------------------|
| Surgery                 | <input type="text"/> |
| Hormone treatment       | <input type="text"/> |
| Other medical treatment | <input type="text"/> |
| No treatment            | <input type="text"/> |
| Don't know              | <input type="text"/> |

Please indicate the exams that were performed for this disease:

|                |                      |
|----------------|----------------------|
| Biopsy         | <input type="text"/> |
| Laparoscopy    | <input type="text"/> |
| Hystero-graphy | <input type="text"/> |
| Hysteroscopy   | <input type="text"/> |
| Ultrasound     | <input type="text"/> |
| Don't know     | <input type="text"/> |

**1997**

Since June 1990, have you had any illnesses of the uterus or ovaries?

Yes  Date of illness  
Month                      Year  
Endometriosis                                  

What was the treatment?

|                         |     |
|-------------------------|-----|
| Surgery                 | Yes |
| Hormone treatment       |     |
| Other medical treatment |     |
| No treatment            |     |
| Don't know              |     |

Please indicate the exams that were performed for this disease:

|               |     |
|---------------|-----|
| Biopsy        | Yes |
| Laparoscopy   |     |
| Hysterography |     |
| Hysteroscopy  |     |
| Ultrasound    |     |
| Don't know    |     |

**2000**

Since April 1997, have you had any illnesses of the uterus or ovaries?

Yes  Date of illness  
Month                      Year  
Endometriosis                                  

What was the treatment?

|                         |     |
|-------------------------|-----|
| Surgery                 | Yes |
| Hormone treatment       |     |
| Other medical treatment |     |
| No treatment            |     |
| Don't know              |     |

Please indicate the exams that were performed for this disease:

|               |     |
|---------------|-----|
| Biopsy        | Yes |
| Laparoscopy   |     |
| Hysterography |     |
| Hysteroscopy  |     |
| Ultrasound    |     |
| Don't know    |     |

**2002**

Since July 2000, have you had any illnesses of the uterus or ovaries?

Yes  Date of illness  
Month                      Year  
Endometriosis                                  

What was the treatment?

|                         |     |
|-------------------------|-----|
| Surgery                 | Yes |
| Hormone treatment       |     |
| Other medical treatment |     |
| No treatment            |     |
| Don't know              |     |

Please indicate the exams that were performed for this disease:

|               |                          |
|---------------|--------------------------|
| Biopsy        | <input type="checkbox"/> |
| Laparoscopy   | <input type="checkbox"/> |
| Hysterography | <input type="checkbox"/> |
| Hysteroscopy  | <input type="checkbox"/> |
| Ultrasound    | <input type="checkbox"/> |
| Don't know    | <input type="checkbox"/> |

**2005**

Since July 2002, have you had any illnesses of the uterus or ovaries?

|               |                       |                                           |                                                                                     |
|---------------|-----------------------|-------------------------------------------|-------------------------------------------------------------------------------------|
|               | Yes                   | Date of illness                           |                                                                                     |
|               | <input type="radio"/> | Month                                     | Year                                                                                |
| Endometriosis | <input type="radio"/> | <input type="text"/> <input type="text"/> | <input type="text"/> <input type="text"/> <input type="text"/> <input type="text"/> |

What was the treatment?

|                         |                          |
|-------------------------|--------------------------|
| Surgery                 | <input type="checkbox"/> |
| Hormone treatment       | <input type="checkbox"/> |
| Other medical treatment | <input type="checkbox"/> |
| No treatment            | <input type="checkbox"/> |
| Don't know              | <input type="checkbox"/> |

Please indicate the exams that were performed for this disease:

|               |                          |
|---------------|--------------------------|
| Biopsy        | <input type="checkbox"/> |
| Laparoscopy   | <input type="checkbox"/> |
| Hysterography | <input type="checkbox"/> |
| Hysteroscopy  | <input type="checkbox"/> |
| Ultrasound    | <input type="checkbox"/> |
| Don't know    | <input type="checkbox"/> |

Growing Up Today Study (GUTS)

**2005**

Has a health care provider ever diagnosed you as having...

|                           |                       |                       |
|---------------------------|-----------------------|-----------------------|
|                           | No                    | Yes                   |
| Endometriosis             | <input type="radio"/> | <input type="radio"/> |
| Confirmed by laparoscopy? | <input type="radio"/> | <input type="radio"/> |

**2007**

Has a doctor or other health care provider ever diagnosed you as having:

|                           |                       |                       |
|---------------------------|-----------------------|-----------------------|
|                           | No                    | Yes                   |
| Endometriosis             | <input type="radio"/> | <input type="radio"/> |
| Confirmed by laparoscopy? | <input type="radio"/> | <input type="radio"/> |

**2010**

Have you ever been told by a health care provider that you have any of the following illnesses?

|                           |                         |                       |                       |                       |                       |                       |                       |
|---------------------------|-------------------------|-----------------------|-----------------------|-----------------------|-----------------------|-----------------------|-----------------------|
|                           | Year of first diagnosis |                       |                       |                       |                       |                       |                       |
|                           | Yes                     | No                    | Before 1996           | 1996-1999             | 2000-2004             | 2005-2009             | 2010+                 |
| Endometriosis             | <input type="radio"/>   | <input type="radio"/> | <input type="radio"/> | <input type="radio"/> | <input type="radio"/> | <input type="radio"/> | <input type="radio"/> |
| Confirmed by laparoscopy? | <input type="radio"/>   | <input type="radio"/> |                       |                       |                       |                       |                       |

**2011**

Have you ever been told by a health care provider that you have any of the following illnesses?

|                           |                       |                       | Year of first diagnosis |                       |                       |                       |
|---------------------------|-----------------------|-----------------------|-------------------------|-----------------------|-----------------------|-----------------------|
|                           | Yes                   | No                    | Before 2004             | 2004-2006             | 2007-2009             | 2010+                 |
| Endometriosis             | <input type="radio"/> | <input type="radio"/> | <input type="radio"/>   | <input type="radio"/> | <input type="radio"/> | <input type="radio"/> |
| Confirmed by laparoscopy? | <input type="radio"/> | <input type="radio"/> |                         |                       |                       |                       |

**2013**

Have you ever been told by a health care provider that you have any of the following illnesses?

|                           |                       |                       | Year of first diagnosis |                       |                       |                       |
|---------------------------|-----------------------|-----------------------|-------------------------|-----------------------|-----------------------|-----------------------|
|                           | Yes                   | No                    | Before 2006             | 2006-2008             | 2009-2011             | 2012+                 |
| Endometriosis             | <input type="radio"/> | <input type="radio"/> | <input type="radio"/>   | <input type="radio"/> | <input type="radio"/> | <input type="radio"/> |
| Confirmed by laparoscopy? | <input type="radio"/> | <input type="radio"/> |                         |                       |                       |                       |

**2014**

Have you ever been told by a health care provider that you have any of the following illnesses?

|                           |                       |                       | Year of first diagnosis |                       |                       |
|---------------------------|-----------------------|-----------------------|-------------------------|-----------------------|-----------------------|
|                           | Yes                   | No                    | Before 2009             | 2009-2013             | 2014+                 |
| Endometriosis             | <input type="radio"/> | <input type="radio"/> | <input type="radio"/>   | <input type="radio"/> | <input type="radio"/> |
| Confirmed by laparoscopy? | <input type="radio"/> | <input type="radio"/> |                         |                       |                       |

**2015**

Have you ever been told by a health care provider that you have any of the following illnesses?

|                           |                       |                       | Year of first diagnosis |                       |                       |
|---------------------------|-----------------------|-----------------------|-------------------------|-----------------------|-----------------------|
|                           | Yes                   | No                    | Before 2010             | 2010-2014             | 2015+                 |
| Endometriosis             | <input type="radio"/> | <input type="radio"/> | <input type="radio"/>   | <input type="radio"/> | <input type="radio"/> |
| Confirmed by laparoscopy? | <input type="radio"/> | <input type="radio"/> |                         |                       |                       |

**2016**

Have you ever been told by a health care provider that you have any of the following illnesses?

|                           |                       |                       | Year of first diagnosis |                       |                       |
|---------------------------|-----------------------|-----------------------|-------------------------|-----------------------|-----------------------|
|                           | Yes                   | No                    | Before 2011             | 2011-2015             | 2016+                 |
| Endometriosis             | <input type="radio"/> | <input type="radio"/> | <input type="radio"/>   | <input type="radio"/> | <input type="radio"/> |
| Confirmed by laparoscopy? | <input type="radio"/> | <input type="radio"/> |                         |                       |                       |

Nurses' Health Study II (NHSII)**1993**

Have you ever had any of these physician-diagnosed illnesses?

|                                    |                       |                       | Year of diagnosis     |                       |                       |                       |
|------------------------------------|-----------------------|-----------------------|-----------------------|-----------------------|-----------------------|-----------------------|
|                                    | Yes                   | No                    | Before 9/1989         | 9/1989-5/1991         | 6/1991-5/1993         | After 6/1993          |
| Endometriosis – 1 <sup>st</sup> Dx | <input type="radio"/> |
| Confirmed by laparoscopy           | <input type="radio"/> | <input type="radio"/> |                       |                       |                       |                       |

**1995**

Since June 1993, have you had any of these physician-diagnosed illnesses?

|                                    |                       |                       | Year of diagnosis     |                       |                       |
|------------------------------------|-----------------------|-----------------------|-----------------------|-----------------------|-----------------------|
|                                    | Yes                   | No                    | Before 6/1/1993       | 6/1993-5/1995         | After 6/1/1995        |
| Endometriosis – 1 <sup>st</sup> Dx | <input type="radio"/> |
| Confirmed by laparoscopy           | <input type="radio"/> | <input type="radio"/> |                       |                       |                       |

**1997**

Since June 1995, have you had any of these physician-diagnosed illnesses?

|                                    |                       |                       | Year of diagnosis     |                       |                       |
|------------------------------------|-----------------------|-----------------------|-----------------------|-----------------------|-----------------------|
|                                    | Yes                   | No                    | Before 6/1/1995       | 6/1995-5/1997         | After 6/1/1997        |
| Endometriosis – 1 <sup>st</sup> Dx | <input type="radio"/> |
| Confirmed by laparoscopy           | <input type="radio"/> | <input type="radio"/> |                       |                       |                       |

**1999**

Since June 1997, have you had any of these physician-diagnosed illnesses?

|                                    |                       |                       | Year of diagnosis     |                       |                       |
|------------------------------------|-----------------------|-----------------------|-----------------------|-----------------------|-----------------------|
|                                    | Yes                   | No                    | Before 6/1/1997       | 6/1997-5/1999         | After 6/1/1999        |
| Endometriosis – 1 <sup>st</sup> Dx | <input type="radio"/> |
| Confirmed by laparoscopy           | <input type="radio"/> | <input type="radio"/> |                       |                       |                       |

**2001**

Since June 1999, have you had any of these physician-diagnosed illnesses?

|                                    |                       |                       | Year of diagnosis     |                       |                       |
|------------------------------------|-----------------------|-----------------------|-----------------------|-----------------------|-----------------------|
|                                    | Yes                   | No                    | Before 6/1/1999       | 6/1999-5/2001         | After 6/1/2001        |
| Endometriosis – 1 <sup>st</sup> Dx | <input type="radio"/> |
| Confirmed by laparoscopy           | <input type="radio"/> | <input type="radio"/> |                       |                       |                       |

**2003**

Since June 2001, have you had any of these physician-diagnosed illnesses?

|                                    |                       |                       | Year of diagnosis     |                       |                       |
|------------------------------------|-----------------------|-----------------------|-----------------------|-----------------------|-----------------------|
|                                    | Yes                   | No                    | Before 6/1/2001       | 6/2001-5/2003         | After 6/1/2003        |
| Endometriosis – 1 <sup>st</sup> Dx | <input type="radio"/> |
| Confirmed by laparoscopy           | <input type="radio"/> | <input type="radio"/> |                       |                       |                       |

**2005**

Since June 2003, have you had any of these clinician-diagnosed illnesses?

|                                    |                       |                       | Year of diagnosis     |                       |                       |
|------------------------------------|-----------------------|-----------------------|-----------------------|-----------------------|-----------------------|
|                                    | Yes                   | No                    | Before 6/1/2003       | 6/2003-5/2005         | After 6/1/2005        |
| Endometriosis – 1 <sup>st</sup> Dx | <input type="radio"/> |
| Confirmed by laparoscopy           | <input type="radio"/> | <input type="radio"/> |                       |                       |                       |

**2007**

Since June 2005, have you had any of these clinician-diagnosed illnesses?

|                                    |                       |                       | Year of diagnosis     |                       |                       |
|------------------------------------|-----------------------|-----------------------|-----------------------|-----------------------|-----------------------|
|                                    | Yes                   | No                    | Before 6/1/2005       | 6/2005-5/2007         | After 6/1/2007        |
| Endometriosis – 1 <sup>st</sup> Dx | <input type="radio"/> |
| Confirmed by laparoscopy           | <input type="radio"/> | <input type="radio"/> |                       |                       |                       |
