# Supplementary material
Source: PubMed Central journal article supplement (PMC8366297)
Supplement: deab012_Supplementary_TableS2.pdf [file deab012_Supplementary_TableS2.pdf]

human reproduction SUPPLEMENTARY DATA

**Supplementary Table S1 Physician, surgical, and pathology record receipt and confirmation proportions for NHSII second wave by infertility status.**

| Cohort                                                         | NHSII second wave      |                        |
|----------------------------------------------------------------|------------------------|------------------------|
|                                                                | Never Infertile        | Concurrent Infertility |
| <b>Relevant medical records received and reviewed (N)</b>      | 137                    | 42                     |
| Found no clinical diagnosis and no surgery performed           | 2                      | 1                      |
| Clinical diagnosis noted but no surgery performed <sup>2</sup> | 2                      | 0                      |
| Surgically confirmed                                           | 113                    | 40                     |
| Clinical diagnosis noted but disconfirmed at surgery           | 1                      | 0                      |
| Found no clinical diagnosis and disconfirmed at surgery        | 5                      | 1                      |
| Pathology-confirmed but not visualized at surgery              | 8                      | 0                      |
| Pathology-confirmed but no surgical report obtained            | 6                      | 0                      |
| <b>Overall confirmation proportion<sup>3</sup></b>             | <b>130/137 (94.9%)</b> | <b>40/42 (95.2%)</b>   |
| Surgically confirmed proportion <sup>4</sup>                   | 113/127 (89.0%)        | 40/41 (97.6%)          |

NHSII, Nurses' Health Study II.

<sup>1</sup>Infertility was defined as attempting to become pregnant for at least 1 year without success. Participants with 'no past or concurrent' infertility were women who never reported infertility. Participants with 'concurrent infertility' were women who reported undergoing an infertility evaluation in the same follow-up cycle as their self-reported endometriosis diagnosis.

<sup>2</sup>Evidence found in the medical records that the participant had been told by her clinician that she most likely had endometriosis but no evidence that she ever had surgery to confirm her diagnosis.

<sup>3</sup>The numerator of this measure includes those who were surgically confirmed and clinically confirmed.

<sup>4</sup>The denominator of this measure includes those who had evidence of surgery in their medical records.
